# Supplementary material for: Determination of the cationic conformational structure of tetrahydrothiophene by one-photon MATI spectroscopy and Franck–Condon fitting
Source: Royal Society of Chemistry journal article supplement (doi:10.1039/d0cp00073f), 2020-01-01
Supplement: d0cp00073f1.pdf [file d0cp00073f1.pdf]

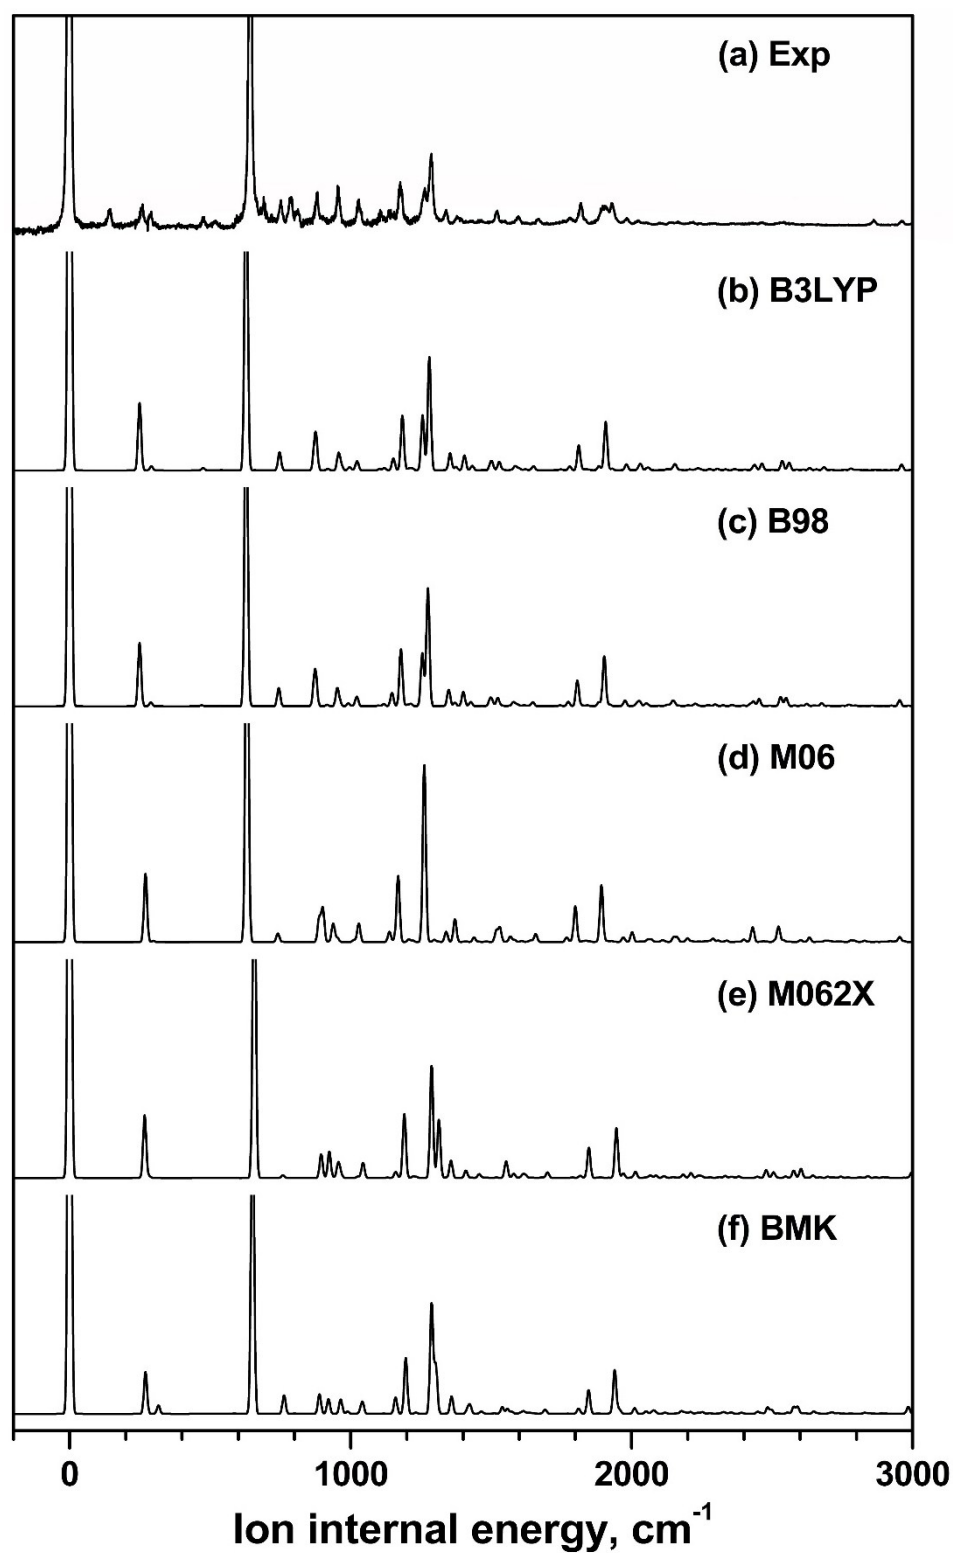

**Figure S1** (a) VUV-MATI spectrum of THT. Simulated spectra using the Franck-Condon factors and the vibrational frequencies calculated at the (b) B3LYP, (c) B98, (d) M06, (e) M062X, and (f) BMK levels with cc-pVTZ basis set for the C<sub>2</sub> conformer. All spectra are magnified by fourfold for detailed comparison.
